# Supplementary material for: Adsorption of ammonium nitrogen in water by modified bentonite compounded with carboxymethyl-β-cyclodextrin
Source: Royal Society of Chemistry journal article supplement (doi:10.1039/d4nj04484c), 2025-01-01
Supplement: d4nj04484c1.pdf [file d4nj04484c1.pdf]

# Supplementary Information

## Adsorption of ammonium nitrogen in water by modified bentonite compounded with carboxymethyl- $\beta$ -cyclodextrin

Yuhan Hu, Renjing Li, Shanshan Lu, Qi Zhu\*

School of Chemistry and Materials Science, Heilongjiang University,  
Heilongjiang Provincial Key Laboratory of Environmental Nanotechnology,  
Harbin 150080, China

\*Corresponding author. Email: [hdzhuqi@126.com](mailto:hdzhuqi@126.com)

### 1.1. Materials

Na-bentonite (bent) was purchased from Hebei province. Carboxymethyl- $\beta$ -cyclodextrin (CMCD) was produced by aladdin. Ethyl orthosilicate (TEOS) was obtained from Fu Chen (Tianjin) Chemical Reagent Co. Epichlorohydrin (EPI) was supplied by Tianjin Damao Chemical Reagent Factory. Potassium iodide (KI) was provided by Tianjin Komeo Chemical Reagent Co. Mercury iodide (HgI) was provided by Tianjin Beilian Fine Chemicals Development Co. Hydrochloric acid (HCl) was provided by Tianjin Yaohua Chemical Reagent Co. Sodium hydroxide (NaOH) was provided by Tianjin Continental Chemical Reagent Factory. Potassium sodium tartrate was provided by Tianjin Tianli Chemical Reagent Co. Ammonium chloride (NH<sub>4</sub>Cl) was provided by Xilong Chemical Co. All the above reagents used in this experiments were analytical grade.

### 1.2. Preparation of modified materials

First of all, 5.00 g of bentonite was put into a crucible and placed in a muffle furnace and calcined at 500°C for 2h. The bentonite used in the following preparation experiments were roasted bentonite.

#### 1.2.1. Synthesis of Acidified Calcined Bent/SiO<sub>2</sub>

Calcined bent/SiO<sub>2</sub> was prepared in accordance with the method described

28 previously Wang Junyi's method[1]. 2 g of calcined bentonite was added to 10 mL of  
29 deionized water and 150 mL of ethanol. Then the mixture was sonicated for 30  
30 minutes. After that, 2 mL of ammonia water was added to the solution and stirred for  
31 10 minutes. Then, 12.5 mL of TEOS was added slowly to the solution and stirred for  
32 8 hours. Finally, calcined bent/SiO<sub>2</sub> was centrifuged several times with deionized  
33 water until pH was neutral. The resulting material was dried and grinded. 2 g of  
34 calcined bent/SiO<sub>2</sub> was added to 100 mL of 0.1mol/L hydrochloric acid solution,  
35 stirred for 12h. Then it was centrifuged several times with deionized water until pH  
36 was neutral and dried. It was used for subsequent experiments.

### 37 **1.2.2. Synthesis of Acidified Calcined Bent/SiO<sub>2</sub>/CMCD**

38 Acidified calcined bent/SiO<sub>2</sub>/CMCD was prepared in accordance with the  
39 method described previously Zheng Shengyang's method[2]. The acidified calcined  
40 bent/SiO<sub>2</sub> was complexed with CMCD. 0.36 g EPI and 1 g CMCD were added to 50  
41 mL of 0.1 mol/L NaOH solution and stirred at 25 °C for 6 h, and then 1.5 g of  
42 acidified calcined bent/SiO<sub>2</sub> was added and stirred for 5 h. The product was  
43 centrifuged, dried, and ground to obtain the final sample.

### 44 **1.3. Characterization methods**

45 The crystalline phases present in composite were determined by means of X-ray  
46 diffraction (Bruker-D8 advance, Germany) using  $\alpha$ -ray light sources for Cu and K.  
47 SEM (Scanning electron microscopy) images of adsorbents were obtained with a  
48 Hitachi S-4800 instrument. Specific surface area and the plot of the pore-diameter  
49 distribution of adsorbent were determined on Brunner-Emmet-Teller (BET) and  
50 Barrett-Joyner-Halenda (BJH) method from N<sub>2</sub> adsorption/desorption isotherm on a  
51 ASAP2460 physical adsorption instrument of Mack in the United States. To  
52 demonstrate the presence of CMCD on the adsorbent, Fourier-Transform Infrared  
53 Spectroscopy (FTIR, Perkin Elmer's Spectorn One system, United States) was applied  
54 in the wave numbers ranging of 400 cm<sup>-1</sup> to 4000 cm<sup>-1</sup>. The surface charges of  
55 modified adsorbent at pH 3 - 11 were analyzed using a Zeta potential analyser  
56 (Malvern Zetasizer Nano, ZS90, United Kingdom). A Thermo Scientific with K-  
57 Alpha was selected to verify the data of X-ray photoelectron spectroscopy (XPS).

- 59 [1] Wang, J. *et al.* Construction of novel graphene-based materials  
60 GO@SiO<sub>2</sub>@C@Ni for Cr(VI) removal from aqueous solution. *Journal of Colloid and*  
61 *Interface Science* **557**, 254-265, doi:10.1016/j.jcis.2019.09.021 (2019).
- 62 [2] Heydari, A., Khoshnood, H., Sheibani, H. & Doostan, F. Polymerization of  
63  $\beta$ -cyclodextrin in the presence of bentonite clay to produce polymer nanocomposites  
64 for removal of heavy metals from drinking water. *Polymers for Advanced*  
65 *Technologies* **28**, 524-532, doi:10.1002/pat.3951 (2016).

66

67
